# Supplementary material
Source: ML conference proceedings conference paper supplement (https://openreview.net/forum?id=PUXy7vQ5M3)
Supplement: supplementary_material [file attachment]

## Install benchmark reproducibility environment

```
conda create -n reproduce_benchmark python=3.10 -y
conda activate reproduce_benchmark
pip install -r requirements.txt
```

## Install tabular

```
conda create -n tabular python=3.9 -y
conda activate tabular
pip install .
pip install -r experiments/generation/tabular/requirements.txt
```

## Install rctgan

```
conda create -n rctgan python=3.7 -y
conda activate rctgan
pip install experiments/generation/rctgan/RCTGAN
```

## Install realtabformer

```
conda create -n realtabformer python=3.9 -y
conda activate realtabformer
pip install .
pip install -r experiments/generation/realtabformer/requirements.txt
```

## Install gretel

```
conda create -n gretel python=3.9 -y
conda activate gretel
pip install .
pip install -r experiments/generation/gretel/requirements.txt
```

# Install ClavaDDPM

```
conda create -n clavaddpm python=3.9 -y  
conda activate clavaddpm  
pip install -r experiments/generation/clavaddpm/requirements.txt
```
