# Supplementary material
Source: ML conference proceedings conference paper supplement (https://openreview.net/forum?id=PUXy7vQ5M3)
Supplement: supplementary_material [file attachment]

# Synthetic Relational Data Providers

This is a list of commercial tools offering synthetic relational data generation services. The list is in alphabetical order.

- aindo
- bluegen
- clearbox.ai
- datacebo
- gretel.ai
- hazy
- mostly.ai
- sarus
- statice
- syndata
- ydata

This list is based on the Ethical AI Database. To add a tool to the list, please submit a pull request.
